# Supplementary material for: Effects of Pre-Anthesis Drought, Heat and Their Combination on the Growth, Yield and Physiology of diverse Wheat (Triticum aestivum L.) Genotypes Varying in Sensitivity to Heat and drought stress
Source: PubMed Central journal article supplement (PMC6502848; doi:10.1038/s41598-019-43477-z), 2019-05-06

**Effects of Pre-Anthesis Drought, Heat and Their Combination on the Growth, Yield and Physiology of diverse Wheat (*Triticum aestivum* L.) Genotypes Varying in Sensitivity to Heat and drought stress.**

Mirza Faisal Qaseem<sup>1\*</sup> Rahmatullah Qureshi<sup>1</sup> and Humaira Shaheen<sup>2</sup>

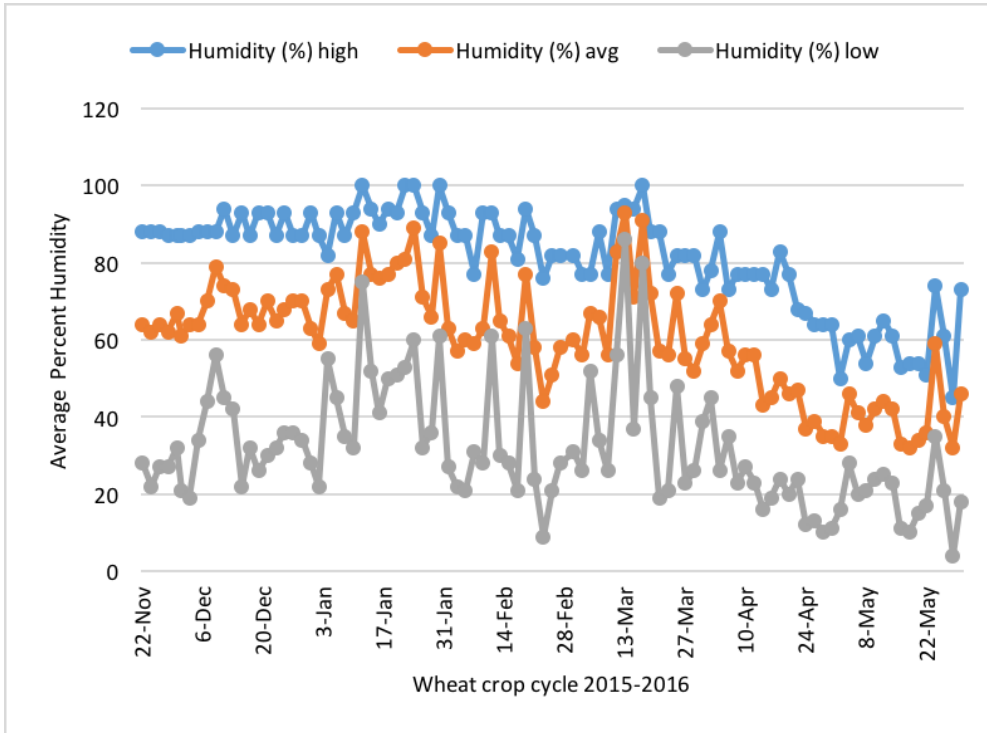

Figure S1. Minimum, Maximum and average temperature of trial location during two cropping seasons 2015-2016

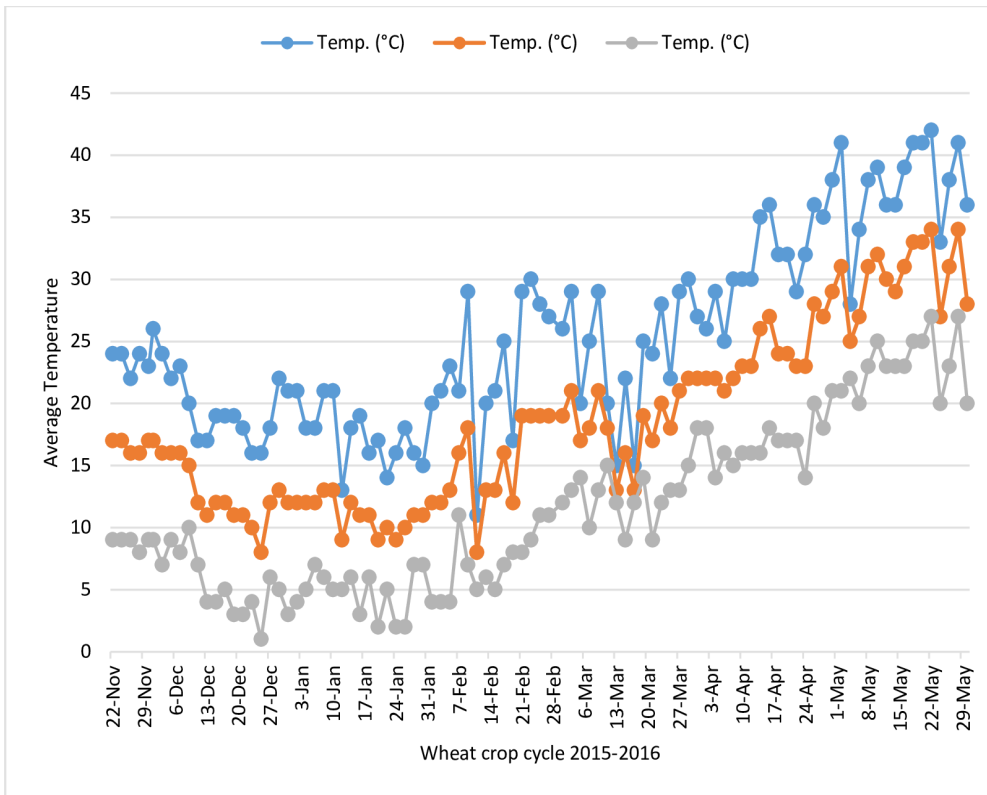

Figure S2. Minimum, Maximum and average precipitation of trial location during two cropping seasons 2015-2016

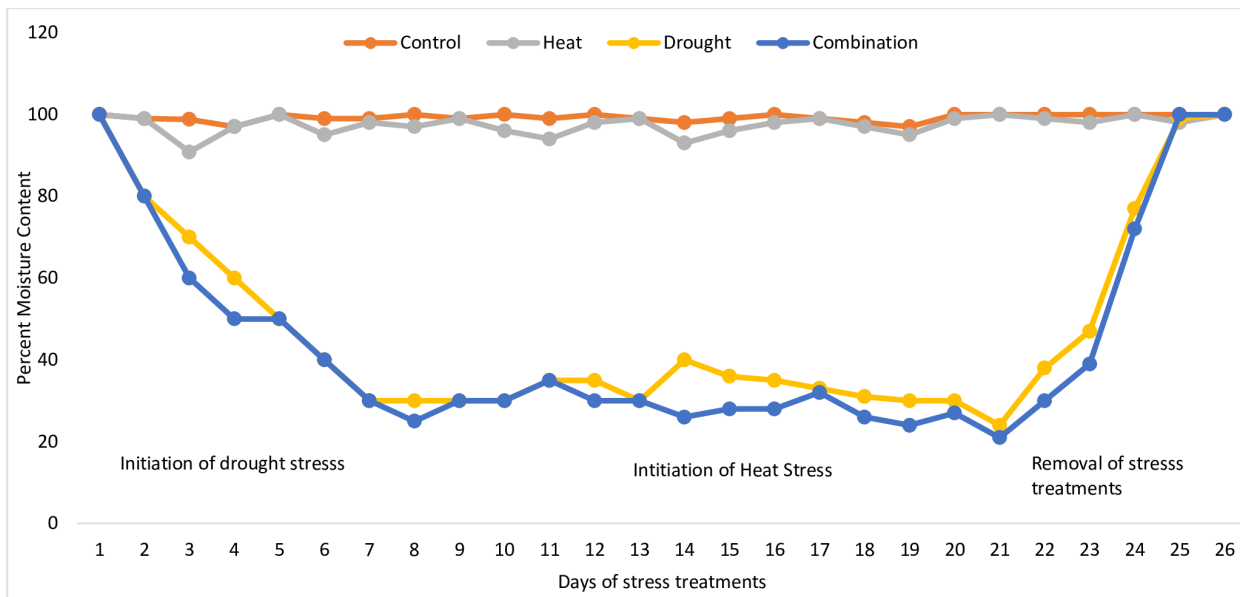

Figure S3. Soil moisture content during the drought treatment, heat treatment period and post-stress period calculated as the mean of the pots planted with the three plants

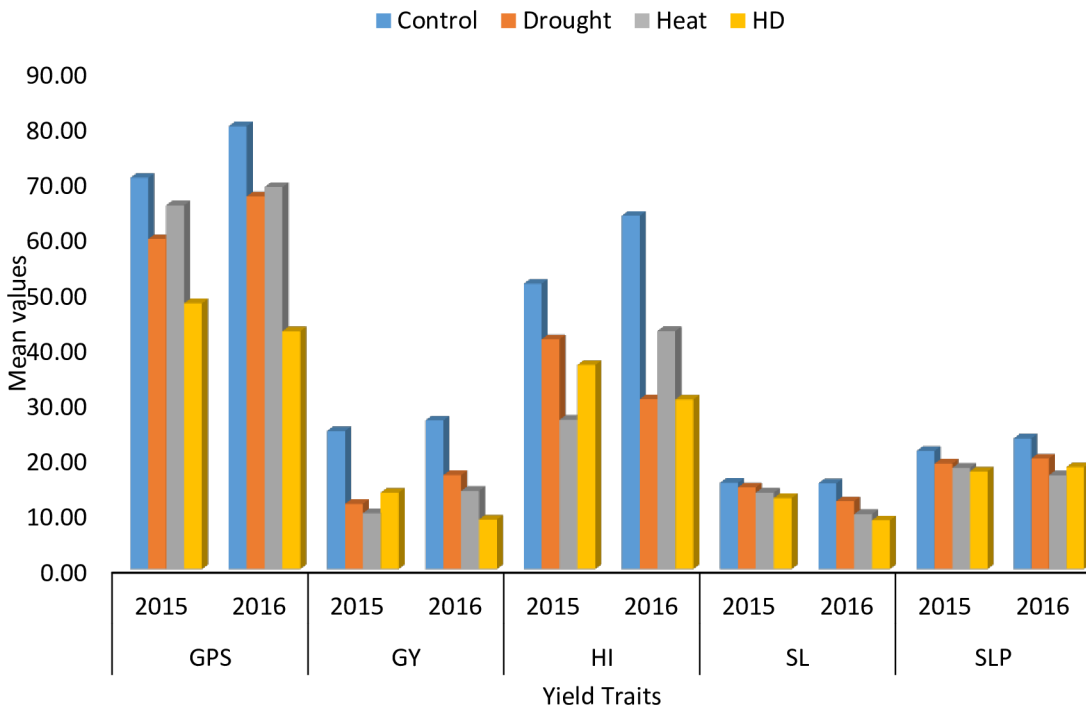

Figure S4: Change in mean values of yield traits across the two cropping years and four stress treatments i.e. [C], [D], [H] and [HD].

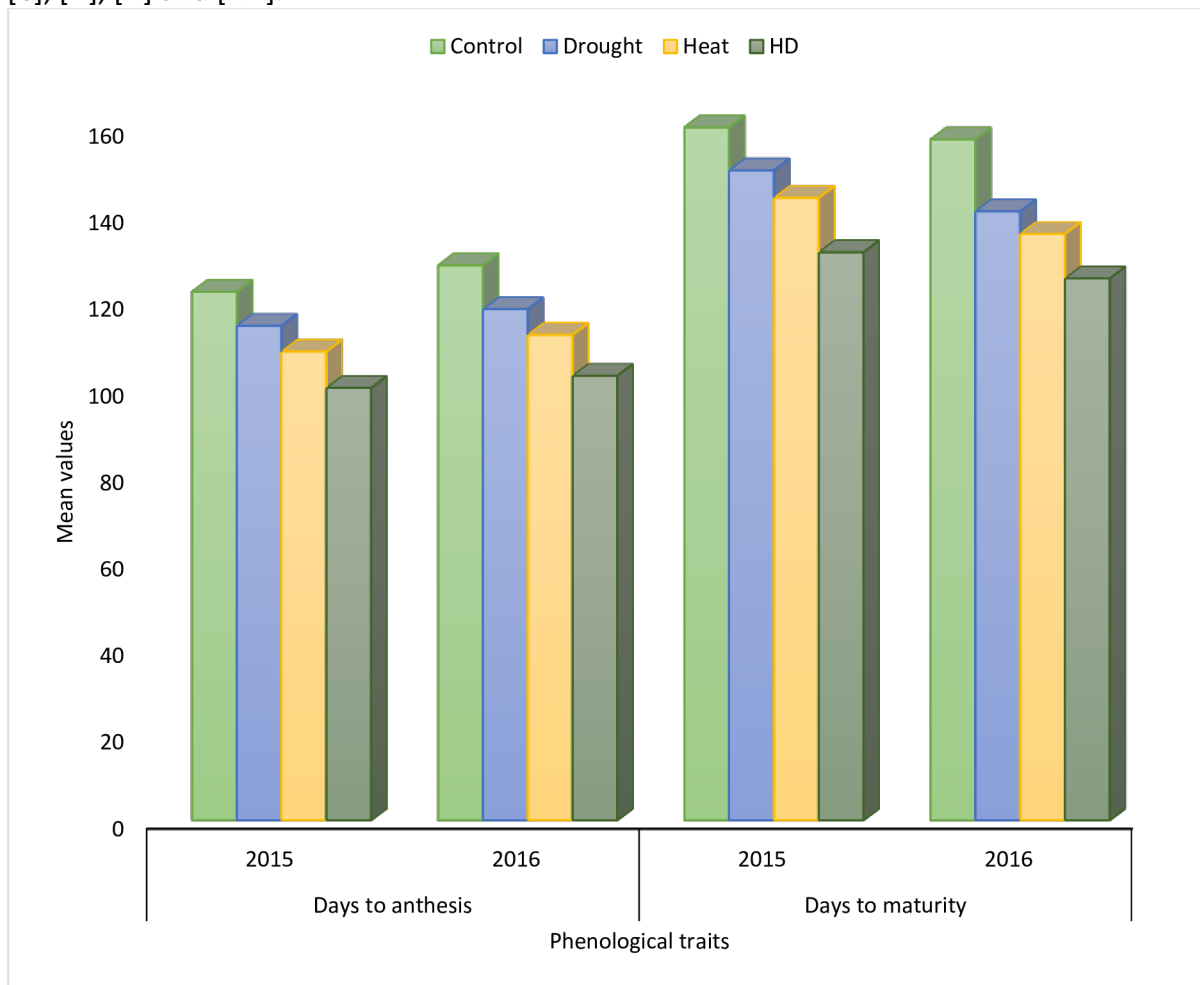

Figure S5: Change in mean values of Phenological traits across the two cropping years and four stress treatments i.e. [C], [D], [H] and [HD].

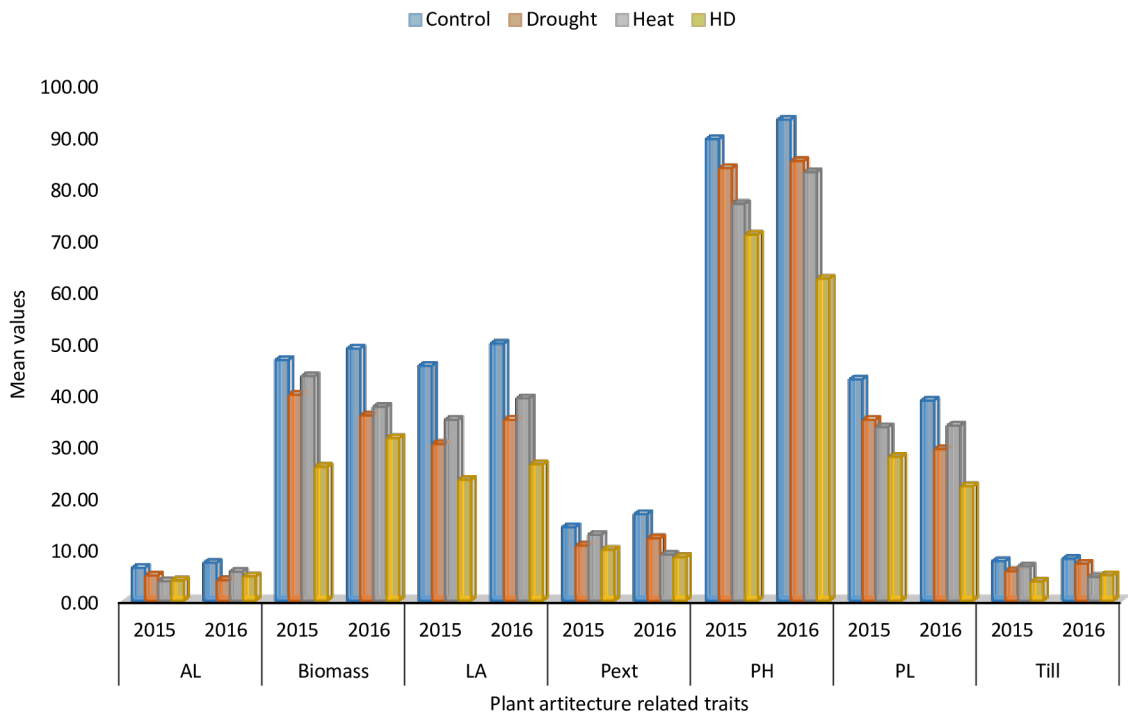

Figure S6: Change in mean values of plant architecture related traits across the two cropping years and four stress treatments i.e. [C], [D], [H] and [HD].

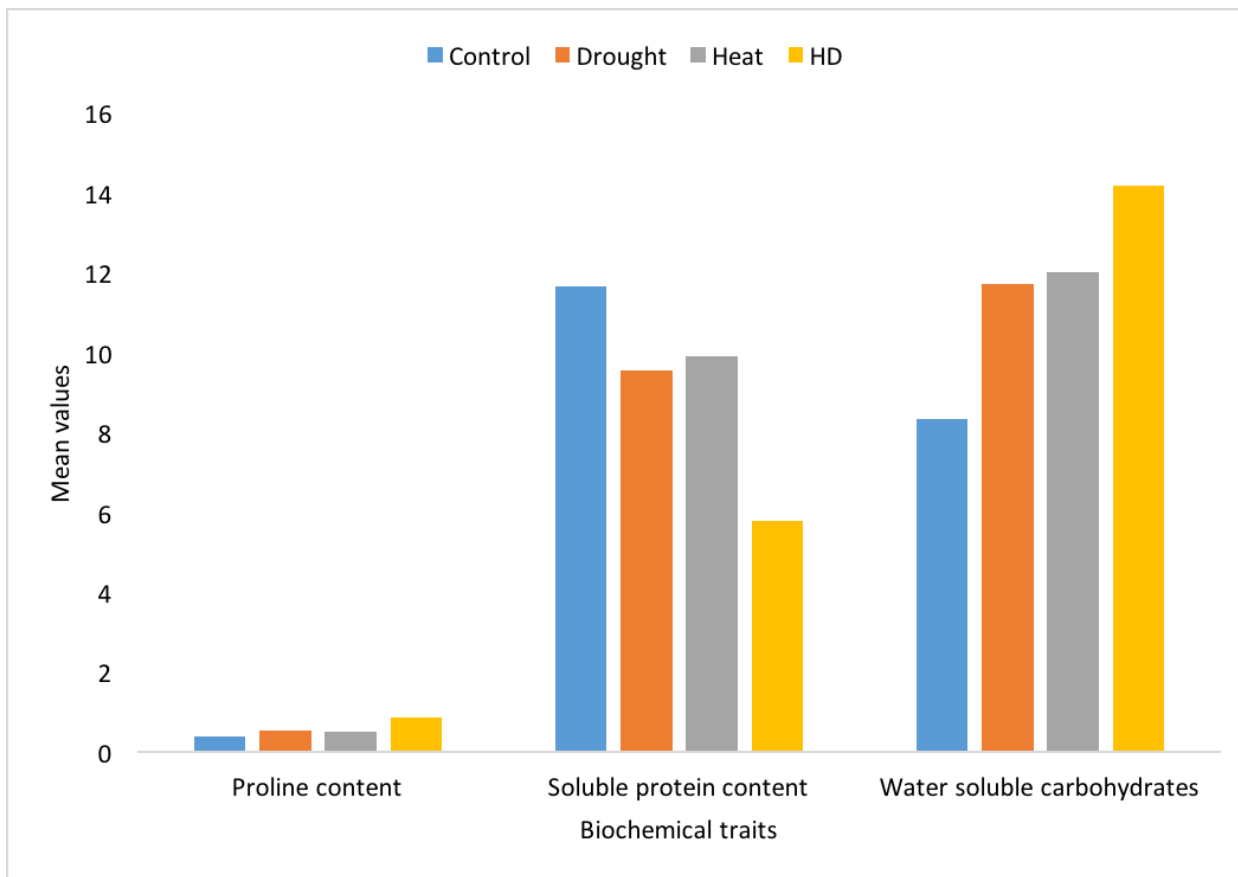

Figure S7: Change in mean values of Biochemical traits against four stress treatments i.e. [C], [D], [H] and [HD].

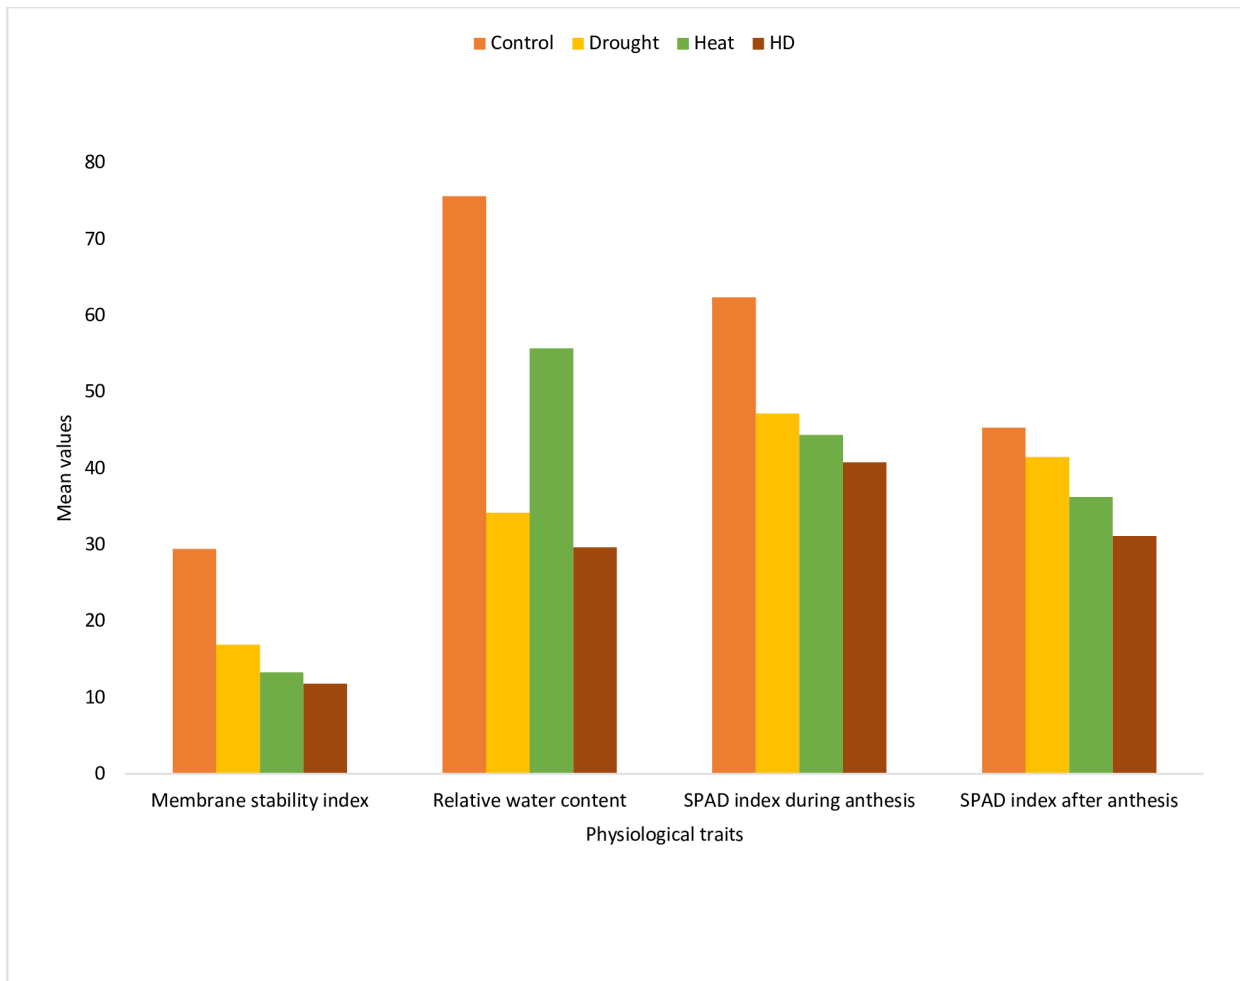

Figure S8: Change in mean values of physiological traits against four stress treatments i.e. [C], [D], [H] and [HD].



Appendix 1: Effect of Heat and drought stress on agro-physiological traits C: Control D: Drought, H: Heat, HD Combined Drought and Heat stress  
 Alphabetic letters: LSD groups

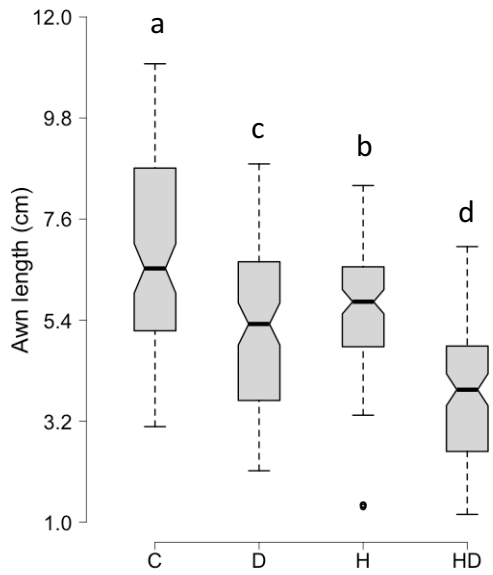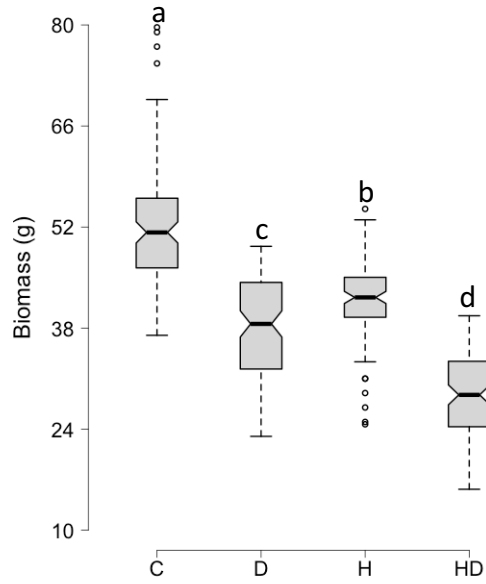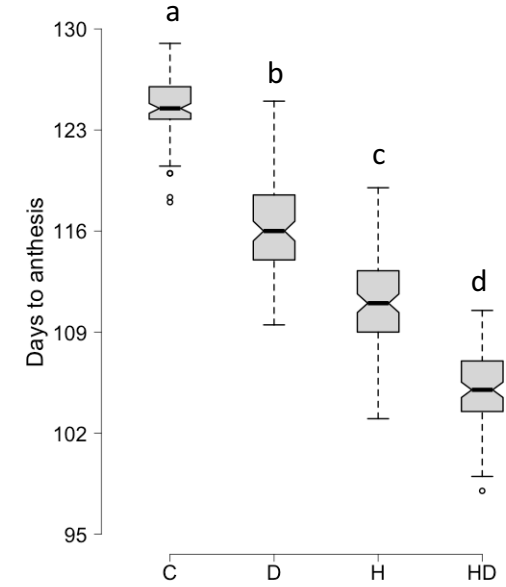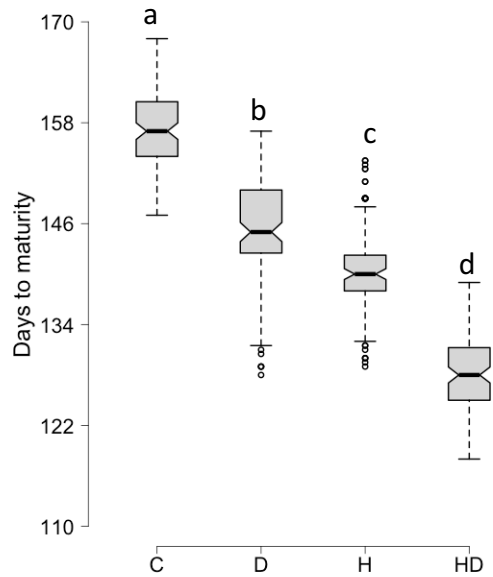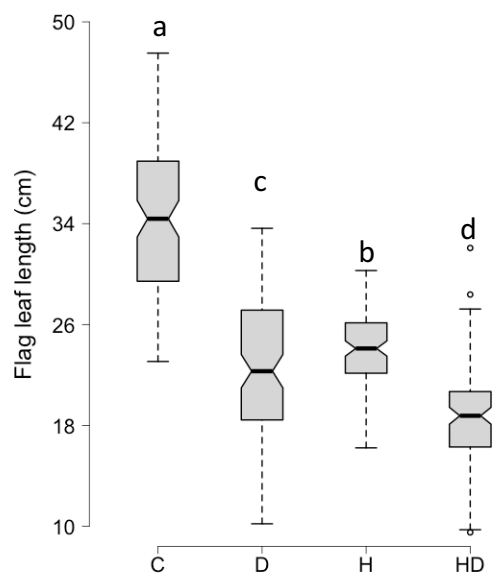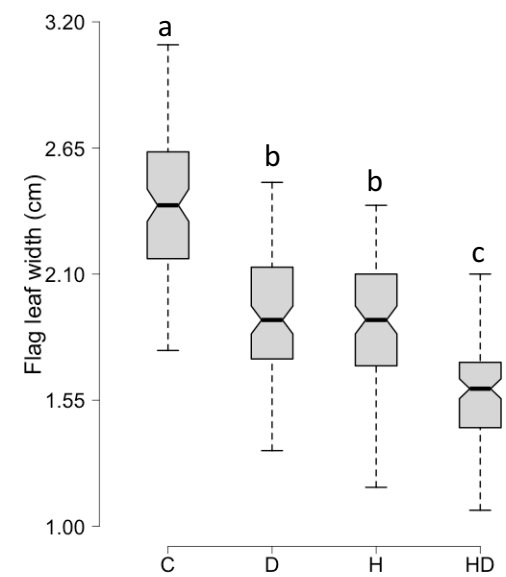

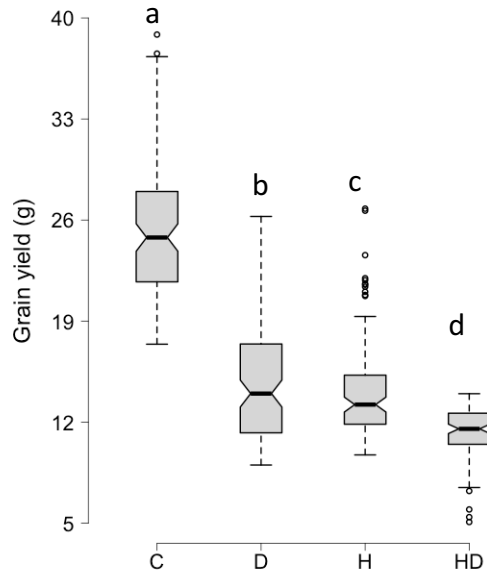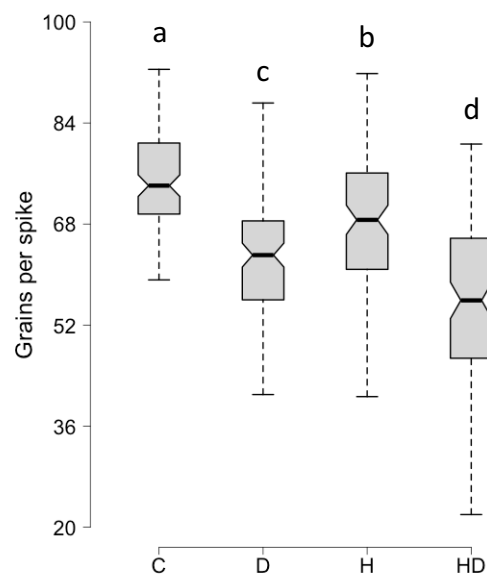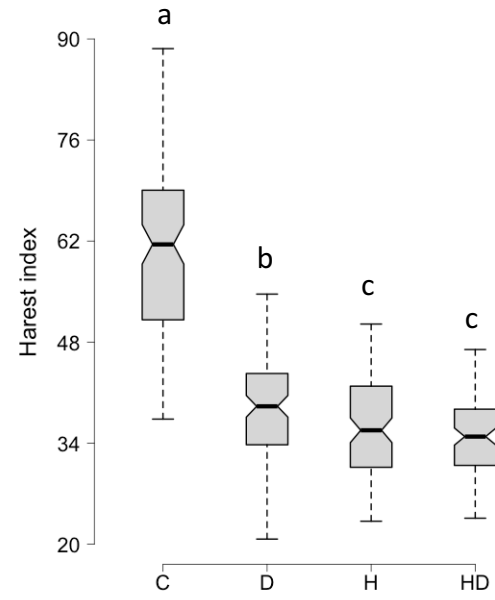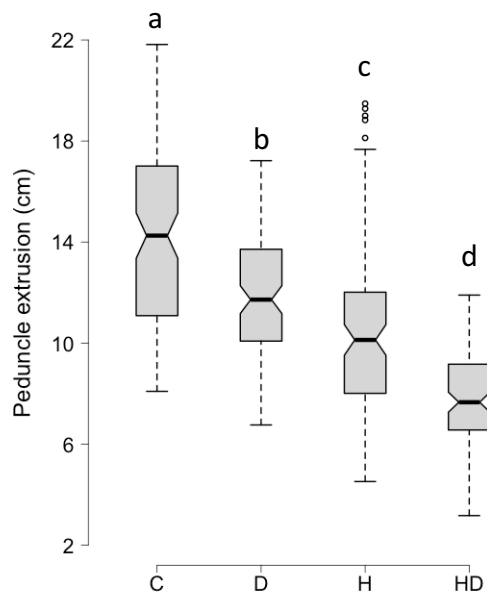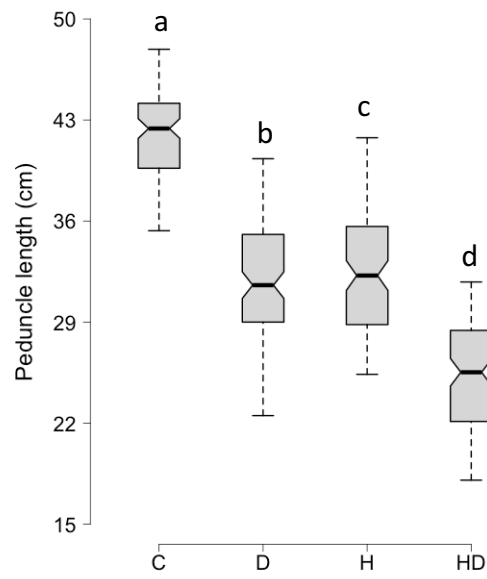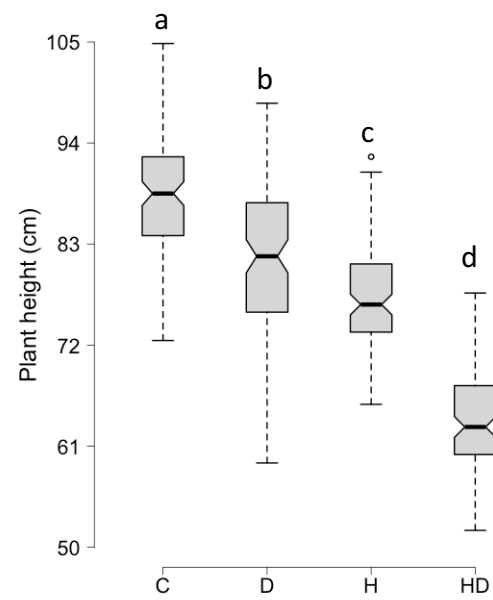

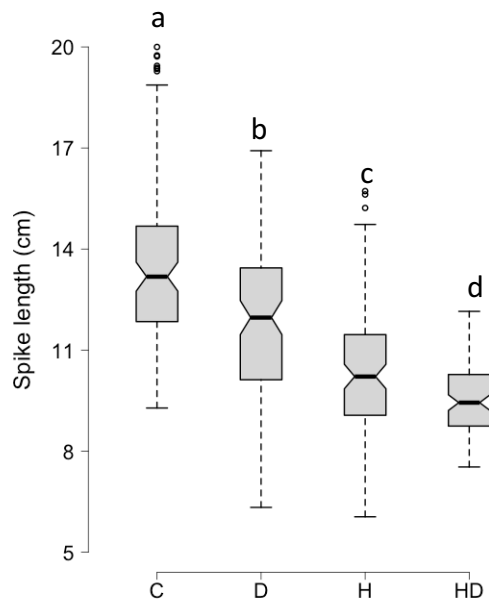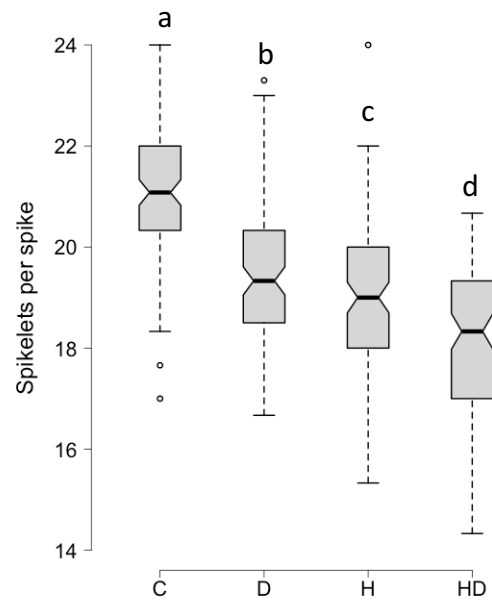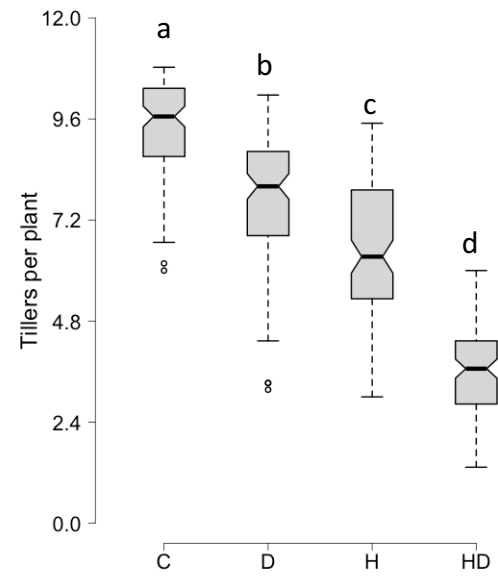

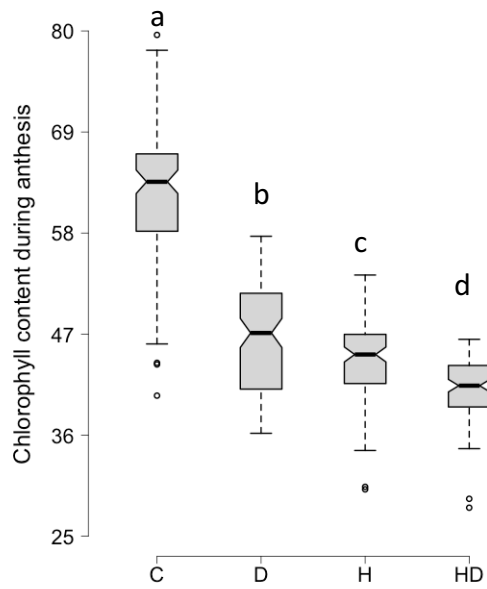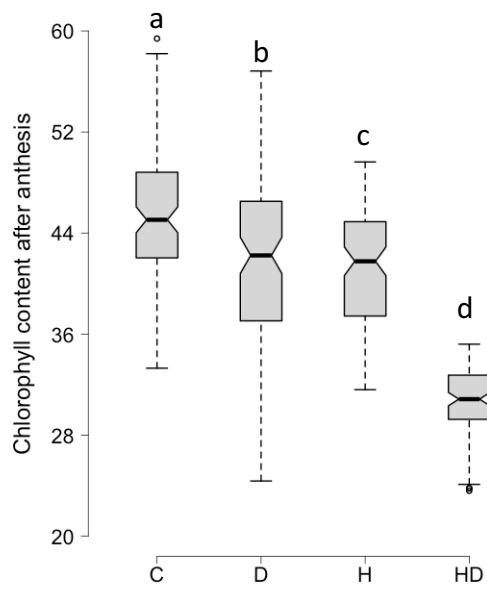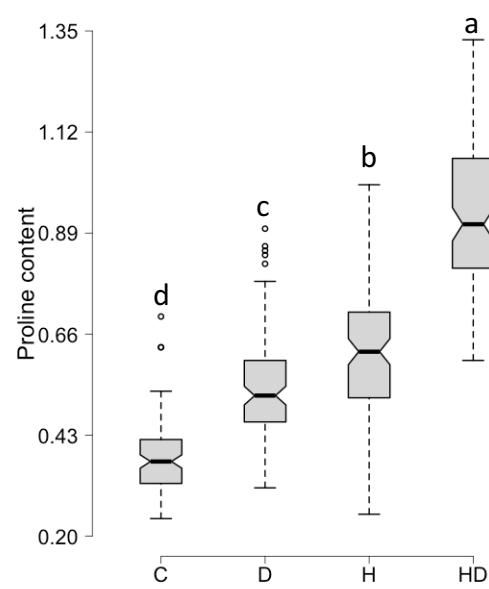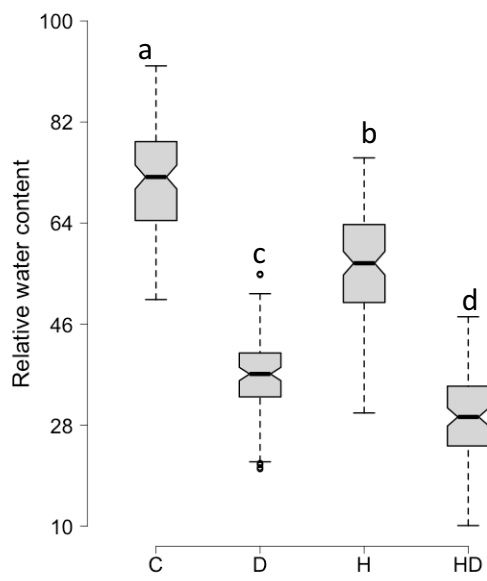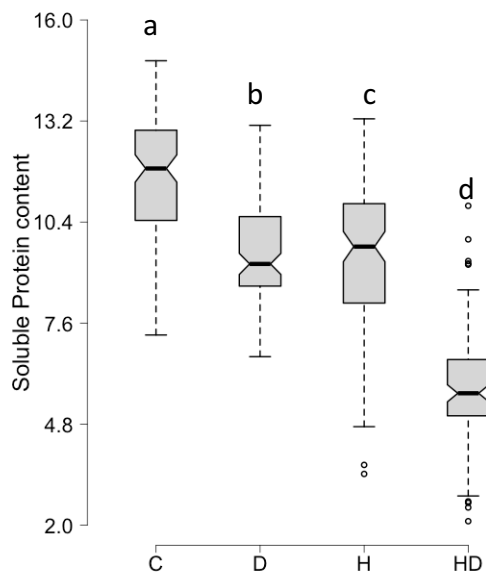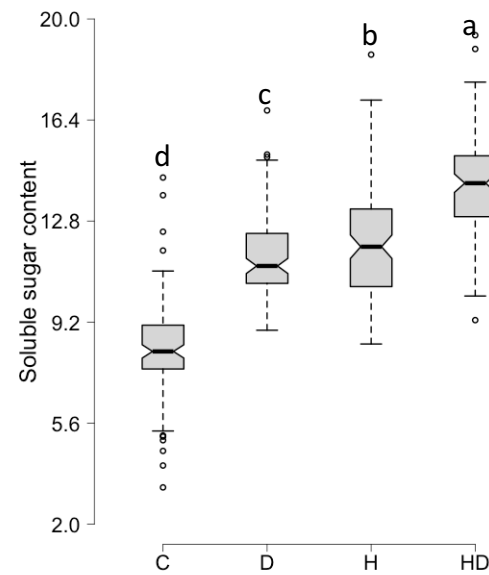

Supplement: 41598_2019_43477_MOESM1_ESM.pdf [file 41598_2019_43477_MOESM1_ESM.pdf]
